# Supplementary material for: Assessment of the necessity of interlobar lymph node dissection in pathological stage IB non-small cell lung cancer: a propensity score-matched study
Source: Research Square preprint supplement (doi:10.21203/rs.3.rs-8433359/v1), 2026-01-25
Supplement: Supplementary file 1 [file 1bf6abc54772652e32098a1d.docx]

| Table 2. Univariate Cox regression analyses of overall survival and recurrence-free survival before propensity score matching | | | | | |
| --- | --- | --- | --- | --- | --- |
| Variables | Total | Overall survival | | Recurrence free survival | |
|  | N=597 | HR (95% CI) | P value | HR (95% CI) | P value |
| Sex |  | 0.87 | 0.414 | 0.93 | 0.585 |
| Male | 425(71.2%) | reference |  | reference |  |
| Female | 172(28.8%) | [0.63-1.22] |  | [0.70-1.22] |  |
| Age |  | 1.68 | <0.001 | 1.33 | 0.035 |
| ≤65 | 405(67.8%) | reference |  | reference |  |
| >65 | 192(32.2%) | [1.25-2.26] |  | [1.02-1.72] |  |
| Smoking |  | 1.28 | 0.099 | 1.07 | 0.594 |
| No | 249(41.7%) | reference |  | reference |  |
| Yes | 348(58.3%) | [0.95-1.73] |  | [0.83-1.38] |  |
| Symptom |  | 1.32 | 0.072 | 1.18 | 0.206 |
| No | 244(40.9%) | reference |  | reference |  |
| Yes | 353(59.1%) | [0.97-1.78] |  | [0.91-1.52] |  |
| Family history of malignant tumor |  | 0.62 | 0.027 | 0.75 | 0.106 |
| No | 501(83.9%) | reference |  | reference |  |
| Yes | 96(16.1%) | [0.40-0.97] |  | [0.52-1.08] |  |
| Differentiation |  | 0.87 | 0.341 | 0.90 | 0.406 |
| Poorly/undifferentiated | 237(39.7%) | reference |  | reference |  |
| Moderately/well differentiated | 360(60.3%) | [0.65-1.16] |  | [0.70-1.16] |  |
| Histology |  | 0.85 | 0.289 | 0.78 | 0.066 |
| Adenocarcinoma | 397(66.5%) | reference |  | reference |  |
| Squamous | 200(33.5%) | [0.62-1.16] |  | [0.59-1.02] |  |
| Visceral Pleural Invasion |  | 0.98 | 0.882 | 1.13 | 0.342 |
| No | 239(40.0%) | reference |  | reference |  |
| Yes | 358(60.0%) | [0.73-1.31] |  | [0.88-1.46] |  |
| Bronchial Invasion |  | 0.75 | 0.121 | 0.81 | 0.161 |
| No | 445(74.5%) | reference |  | reference |  |
| Yes | 152(25.5%) | [0.52-1.09] |  | [0.60-1.10] |  |
| interlobar lymph node dissection |  | 0.89 | 0.446 | 0.85 | 0.197 |
| No | 262(43.9%) | reference |  | reference |  |
| Yes | 335(56.1%) | [0.67-1.19] |  | [0.66-1.09] |  |
| Number of lymph node stations dissected |  | 0.72 | 0.055 | 0.86 | 0.282 |
| <6 | 428(71.7%) | reference |  | reference |  |
| ≥6 | 169(28.3%) | [0.51-1.02] |  | [0.65-1.14] |  |
| Number of lymph nodes dissected |  | 0.65 | 0.004 | 0.75 | 0.025 |
| <12 | 269(45.1%) | reference |  | reference |  |
| ≥12 | 328(54.9%) | [0.49-0.87] |  | [0.59-0.97] |  |
| Chemotherapy |  | 0.55 | 0.009 | 0.78 | 0.165 |
| No | 501(83.9%) | reference |  | reference |  |
| Yes | 96(16.1%) | [0.34-0.89] |  | [0.54-1.12] |  |
