# Supplementary material for: Assessment of the necessity of interlobar lymph node dissection in pathological stage IB non-small cell lung cancer: a propensity score-matched study
Source: Research Square preprint supplement (doi:10.21203/rs.3.rs-8433359/v1), 2026-01-25
Supplement: Supplementary file 2 [file f14342f3dd54ee59e48ea8e0.docx]

| Table 1. Comparison of clinicopathological characteristics between the original and propensity score–matched cohorts according to interlobar lymph node dissection | | | | | | | | |
| --- | --- | --- | --- | --- | --- | --- | --- | --- |
| Variables | Original data set | | | | Matched data set | | | |
| Total | Interlobar lymph node dissection | | P value | Total | Interlobar lymph node dissection | | P value |
| N=597 | No (N=262) | Yes (N=335) | N=458 | No (N=229) | Yes (N=229) |
| Sex |  |  |  | 0.364 |  |  |  | 0.917 |
| Female | 172(28.8%) | 70(11.7%) | 102(17.1%) |  | 128(27.9%) | 63(13.8%) | 65(14.2%) |  |
| Male | 425(71.2%) | 192(32.2%) | 233(39.0%) |  | 330(72.1%) | 166(36.2%) | 164(35.8%) |  |
| Age |  |  |  | 0.271 |  |  |  | 0.483 |
| >65 | 192(32.2%) | 91(15.2%) | 101(16.9%) |  | 146 (31.9%) | 77 (16.8%) | 69 (15.1%) |  |
| ≤65 | 405(67.8%) | 171(28.6%) | 234(39.2%) |  | 312 (68.1%) | 152 (33.2%) | 160 (34.9%) |  |
| Smoking |  |  |  | 0.193 |  |  |  | 0.567 |
| No | 249(41.7%) | 101(16.9%) | 148(24.8%) |  | 183(40.0%) | 88(19.2%) | 95(20.7%) |  |
| Yes | 348(58.3%) | 161(27.0%) | 187(31.3%) |  | 275(60%) | 141(30.8%) | 134(29.3%) |  |
| Symptom |  |  |  | 1.000 |  |  |  | 0.924 |
| No | 244(40.9%) | 107(17.9%) | 137(22.9%) |  | 186(40.6%) | 92(20.1%) | 94(20.5%) |  |
| Yes | 353(59.1%) | 155(26.0%) | 198(33.2%) |  | 272(59.4%) | 137(29.9%) | 135(29.5%) |  |
| Family history of malignant tumor |  |  |  | 0.053 |  |  |  | 0.601 |
| No | 501(83.9%) | 229(38.4%) | 272(45.6%) |  | 389(84.9%) | 197(43.0%) | 192(41.9%) |  |
| Yes | 96(16.1%) | 33(5.5%) | 63(10.6%) |  | 69 (15.1%) | 32 (7.0%) | 37 (8.1%) |  |
| Differentiation |  |  |  | 0.152 |  |  |  | 1.000 |
| Poorly/undifferentiated | 237(39.7%) | 113(18.9%) | 124(20.8%) |  | 186(40.6%) | 93(20.3%) | 93(20.3%) |  |
| Moderately/well differentiated | 360(60.3%) | 149(25.0%) | 211(35.3%) |  | 272(59.4%) | 136(29.7%) | 136(29.7%) |  |
| Histology |  |  |  | 0.127 |  |  |  | 0.690 |
| Adenocarcinoma | 397(66.5%) | 165(27.6%) | 232(38.9%) |  | 309(67.5%) | 152(33.2%) | 157(34.3%) |  |
| Squamous | 200(33.5%) | 97(16.2%) | 103(17.3%) |  | 149(32.5%) | 77(16.8%) | 72(15.7%) |  |
| Visceral Pleural Invasion |  |  |  | 0.051 |  |  |  | 1.0000 |
| No | 239(40.0%) | 117(19.6%) | 122(20.4%) |  | 179(39.1%) | 90(19.7%) | 89(19.4%) |  |
| Yes | 358(60.0%) | 145(24.3%) | 213(35.7%) |  | 279(60.9%) | 139(30.3%) | 140(30.6%) |  |
| Bronchial Invasion |  |  |  | 1.000 |  |  |  | 0.666 |
| No | 445(74.54%) | 195(32.7%) | 250(41.9%) |  | 343(74.9%) | 169(36.9%) | 174(38.0%) |  |
| Yes | 152(25.46%) | 67(11.2%) | 85(14.2%) |  | 115(25.1%) | 60(13.1%) | 55(12.0%) |  |
| Number of lymph node stations dissected |  |  |  | ＜0.001 |  |  |  | 0.112 |
| ＜6 | 428(71.7%) | 220(36.9%) | 208(34.8%) |  | 359(78.4%) | 187(40.8%) | 172(37.6%) |  |
| ≥6 | 169(28.3%) | 42(7.0%) | 127(21.3%) |  | 99(21.6%) | 42(9.2%) | 57(12.4%) |  |
| Number of lymph nodes dissected |  |  |  | ＜0.001 |  |  |  | 0.304 |
| ＜12 | 269(45.1%) | 151(25.3%) | 118(19.8%) |  | 232(50.7%) | 122(26.6%) | 110(24.0%) |  |
| ≥12 | 328(54.9%) | 111(18.6%) | 217(36.3%) |  | 226(49.3%) | 107(23.4%) | 119(26.0%) |  |
| Chemotherapy |  |  |  | 0.153 |  |  |  | 1.000 |
| No | 501(83.9%) | 213(35.7%) | 288(48.2%) |  | 384(83.8%) | 192(41.9%) | 192(41.9%) |  |
| Yes | 96(16.1%) | 49(8.2%) | 47(7.9%) |  | 74(16.2%) | 37(8.1%) | 37(8.1%) |  |
